# Supplementary material for: Subjective survival probabilities by employment category and job satisfaction among the fifty-plus population in Japan
Source: bioRxiv or medRxiv preprint supplement (doi:10.1101/2023.01.01.23284103), 2023-01-04

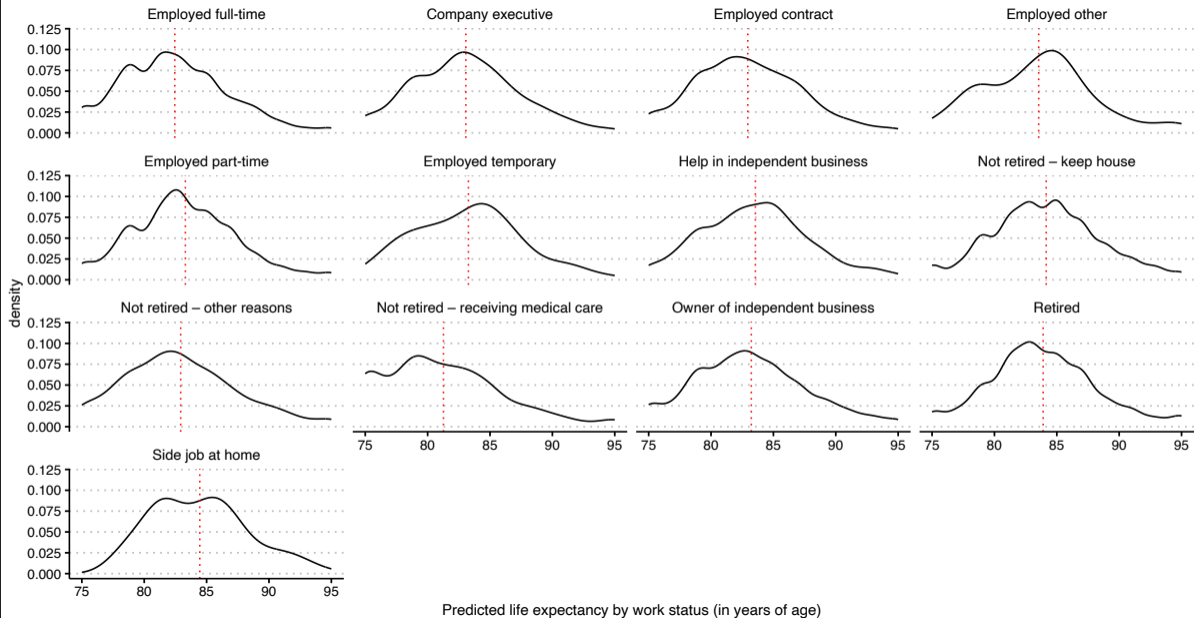

Supplement: Supplementary file [file media-3.pdf]
